# Supplementary material
Source: ML conference proceedings conference paper supplement (https://openaccess.thecvf.com/content/CVPR2025/html/Shu_Video-XL_Extra-Long_Vision_CVPR_2025_paper.html)
Supplement: Supplementary file 1 [file Shu_Video-XL_Extra-Long_Vision_CVPR_2025_supplemental.pdf]

# Video-XL: Extra-Long Vision Language Model for Hour-Scale Video Understanding

## Supplementary Material

### Overview of Supplementary Material

- [A: Limitations and Future Works](#)
- [B: Relations to Concurrent Works](#)
- [C: Details in LLM Compressor](#)
- [D: Further Discussion of Video-XL](#)
- [E: Analysis of VICO Dataset](#)
- [F: Experimental Settings and Additional Results](#)
- [G: Qualitative Results](#)

### A. Limitations and Future Works

Although Video-XL has a strong capacity to handle extremely long videos, it also has several limitations: (i) Large training memory cost: During training, we unfreeze all parameters of CLIP, the vision-language projector, and the LLM, requiring substantial GPU memory. Additionally, processing video frame extraction and handling a large number of visual tokens demand extra computational resources. We will continue to optimize the training process to improve efficiency or integrate smaller-scale LLMs. (ii) Performance decline with increasing visual tokens: As shown in the Needle-in-the-haystack evaluation, Video-XL occasionally makes errors when the context exceeds 1,000 frames. In the future, we will continue to improve the visual compression module and reduce the information decay for longer video understanding.

### B. Relation to Concurrent Works

In this section, we compare and discuss the relation between our Video-XL with the concurrent works including LongVA [53] and VoCo-LLaMA [51].

**Comparison to LongVA.** Though Video-XL shares a similar model architecture with LongVA, they have several important distinctions. First, although the unified visual encoding mechanism resembles that of LongVA, Video-XL simultaneously encodes single images, multiple images, and videos during training, whereas LongVA only uses image data. Furthermore, we explore the knowledge transfer extensively, conducting experiments to demonstrate that single images and multiple images contribute to long video understanding from different perspectives. Regarding technical contributions to improving long-context processing capability, LongVA fine-tunes the LLM to extend its context length, while Video-XL designs Visual Summarization Token and learns to compress visual tokens. Consequently, Video-XL can handle more visual tokens than LongVA using the same computing device.

**Comparison to VoCo-LLaMA.** Like VoCo-LLaMA, Video-XL also leverages the inherent capability of LLMs to compress visual tokens. Beyond VoCo-LLaMA for image token compression, Video-XL introduces several significant technical contributions that distinguish it from that one. Firstly, VoCo-LLaMA appends all special tokens at the end of a chunk, while our Video-XL splits long visual token sequences into fine-grained intervals and interleaved special tokens. Thus, VoCo-LLaMA has difficulty in handling long videos. Secondly, the dynamic compression is utilized in Video-XL to ensure the control of compression granularity within a video. Thirdly, we optimize the training process by utilize composite data curation and curriculum learning techniques. Since the official weights of VoCo-LLaMA have not been released, we cannot comprehensively compare the models on long video benchmarks. Therefore, we report our performance (in Table 1) on image understanding benchmarks for reference, though our model mainly designed is for video understanding. It shows that Video-XL achieves significantly better results than VoCo-LLaMa even though on image benchmarks.

| Model      | Compression Ratio | MMB  | GQA  | SEED |
|------------|-------------------|------|------|------|
| VoCo-LLaMA | -                 | 64.0 | 61.1 | 57.9 |
| VoCo-LLaMA | 8                 | 60.5 | 60.4 | 56.3 |
| VoCo-LLaMA | 16                | 59.4 | 60.2 | 56.2 |
| Video-XL   | -                 | 71.6 | 60.0 | 61.6 |
| Video-XL   | 8                 | 71.4 | 59.3 | 61.2 |
| Video-XL   | 16                | 70.9 | 59.1 | 61.0 |

Table 1. Comparison with VoCo-LLaMA under different compression ratios on image understanding benchmarks.

### C. Details in LLM Compressor

In our work, we split long visual sequences into shorter intervals and introduce the special tokens, namely the VSTs, which condense LLM’s raw activations into more compact ones. Consequently, the same context window can intake more information from the previous context, which will benefit the prediction of new tokens. In each decoding layer of the LLM, let  $D$  denote the LLM’s hidden size and  $L$  is the size of the chunk, the input hidden states of VSTs ( $H_{vst} \in \mathbb{R}^{k \times D}$ ) are transformed to query the raw KV activations within the chunk:  $\{K, V \mid K \in \mathbb{R}^{L \times D}, V \in \mathbb{R}^{L \times D}\}$ , where the condensed activations can be produced.

Formally,

$$Q_{vst} \leftarrow H_{vst} W'_Q, \quad K_{vst} \leftarrow H_{vst} W'_K, \quad V_{vst} \leftarrow H_{vst} W'_V \quad (4)$$

$$A \leftarrow \text{softmax}(\text{mask}(Q_{vst}\{K \oplus K_{vst}\}^T)) \quad (5)$$

$$V_{vst} \leftarrow A\{V \oplus V_{vst}\}^T, \quad O_{vst} \leftarrow V_{vst} W'_O. \quad (6)$$

The newly generated KV activations for the VSTs, i.e.,  $K_{vst}, V_{vst} \in \mathbb{R}^{k \times D}$ , which leads to a condensing ratio of  $\alpha = L/k$  ( $k \ll L$ ). Moreover, the VSTs are parameter-efficient because they primarily rely on the LLM’s original parameters, introducing only a few additional projection matrices. For instance, they add no more than 1B parameters to the Qwen2 7B base model.

## D. Further Discussion of Video-XL

In this section, we discuss more details about Video-XL, including the training method, computational efficiency and generalization.

### Ablation studies on dynamic compression strategy.

Our dynamic compression strategy enables Video-XL to control the granularity of compression. We conduct empirical experiments to demonstrate the effectiveness of this strategy. Specifically, we compare dynamic compression with fixed methods that use different fixed interval sizes to encode video segments. As shown in Table 2, the performance of Video-XL is sensitive to the hyperparameter of fixed size  $L$ . Generally, larger  $L$  results in poorer performance, as coarse-grained compression can damage detailed visual information. While smaller  $L$  improves performance, it is highly benchmark-dependent and incurs longer training times. In contrast, dynamic compression allows Video-XL to achieve consistent performance across all benchmarks.

| L (tokens)      | Video-MME | MLVU | MMB  |
|-----------------|-----------|------|------|
| $144 \times 2$  | 41.3      | 52.3 | 71.5 |
| $144 \times 4$  | 40.7      | 52.1 | 70.6 |
| $144 \times 8$  | 39.4      | 51.0 | 69.6 |
| $144 \times 16$ | 38.9      | 50.5 | 69.5 |
| $144 \times 32$ | 38.6      | 50.1 | 69.2 |
| Dynamic         | 41.6      | 52.3 | 71.3 |

Table 2. Ablations on dynamic compression strategy.

**Ablation studies on training methods.** To train Video-XL more effectively, we explored various methods based on visual instruction tuning, primarily differing in the fine-tuning phase. In the first, two-stage method, we initially trained for one epoch without setting compression parameters. Next, we froze the parameters of CLIP, the projector, and all pre-trained LLM parameters, optimizing only

the newly introduced parameters in the compression module for an additional epoch using the same data. In the second, single-stage method, we activated all parameters and trained for two epochs with the same training data. The results of both methods are reported in the table. Compared to the second method, the first method achieved better training efficiency, though the second method produced superior results. We speculate that this is mainly because the projector pre-aligns CLIP and the LLM, making it less adaptable to compressed knowledge.

| Model       | Video-MME | MLVU | MMB  | Training time |
|-------------|-----------|------|------|---------------|
| Upper-bound | 41.8      | 52.6 | 71.6 | -             |
| One-Stage   | 35.3      | 46.8 | 66.7 | 1.5 days      |
| Two-stage   | 41.4      | 52.0 | 70.9 | 2 days        |

Table 3. Ablation studies on training methods of Video-XL.

**Discussion on the computational efficiency.** Video-XL reduces the KV cache by  $\alpha$  times where  $\alpha$  is the *average compression ratio* and hence the memory cost. This is because it only needs to store the compressed activations of the preceding chunks instead of the raw activations. In terms of computation, the situation is a bit more complex. Specifically, Video-XL significantly reduces the computation in self-attention, because each token only needs to interact with local tokens within the chunk and preceding VSTs, which are approximately  $\alpha$  times shorter than the raw context. However, it also triggers more computation to encode the inserted VSTs in other modules (e.g., MLP). Formally, given an LLM with a fixed number of layers, attention heads, and hidden size, let  $s$  denote the input context length,  $s^{pst}$  denote the cached context length, the forward FLOPs is:

$$\text{FLOPs} = F^{Att}(s, s^{pst}) + F^{Oth}(s), \quad (7)$$

where  $F^{Att}$  is the computation during self attention, and  $F^{Oth}$  is the computation of other modules. For full-attention models,  $s = n, s^{pst} = 0$ . For the LLM compressor in Video-XL, the FLOPs is:

$$\text{FLOPs}^{bcn} = \sum_{i=1}^{\lceil \frac{n}{\alpha} \rceil} F^{Att}\left(\frac{(\alpha+1)w}{\alpha}, \frac{(i-1)w}{\alpha}\right) + F^{Oth}(n + \lceil \frac{n}{\alpha} \rceil) \quad (8)$$

Specifically, denote the input sequence length as  $s$ , the cached sequence length as  $s^{pst}$ , query head number as  $h^q$ , key/value head number as  $h^k$ , the hidden size  $D$ , head dimension as  $d$ , intermediate size  $I$ , and vocabulary size  $V$ , FLOPs can be calculated as follows:

$$\begin{aligned}
F^{Att} &= F^{qkv} + F^{qk} + F^{softmax} + F^{av} + F^{out} \\
F^{qkv} &= 2 \times s \times D \times d \times h^q + 2 \times 2 \times s \times D \times d \times h^k \\
F^{qk} &= 2 \times h^q \times s \times (s + s^{pst}) \times d \\
F^{soft} &= h^q \times (s + s^{pst}) \times (s + s^{pst}) \\
F^{av} &= 2 \times h^q \times s \times (s + s^{pst}) \times d \\
F^{out} &= 2 \times s \times d \times h^q \times D \\
F^{Oth} &= F^{up} + F^{gate} + F^{down} + F^{lm} \\
F^{up} &= 2 \times s \times D \times 2 \times I \\
F^{gate} &= s \times \times I \\
F^{down} &= 2 \times s \times D \times I \\
F^{lm} &= 2 \times s \times D \times V
\end{aligned} \tag{9}$$

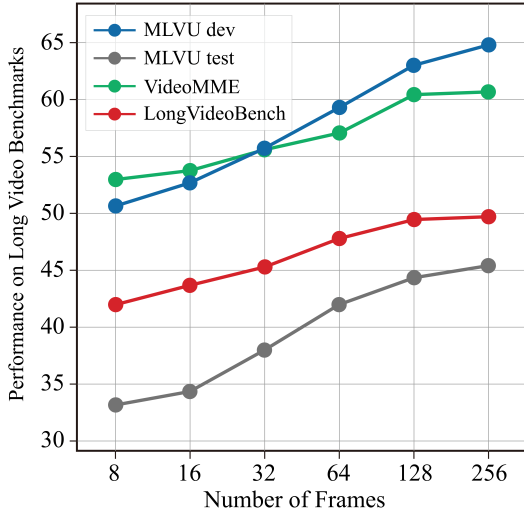

Figure 1. Video-XL can achieve better performance on long video benchmarks with increased context length.

**Discussion on the Generalization.** We find that Video-XL demonstrates strong generalization capabilities. On one hand, the language compressor can be flexibly applied across various language models. In addition to Qwen2, we conducted experiments with Vicuna and LLaMA2, with results shown in the Table 5. In the future, we plan to introduce smaller language models to enable Video-XL to process longer videos on a single GPU. On the other hand, Video-XL requires only relatively short videos (under two minutes) for training but can handle videos nearly an hour long during inference. We believe this is largely due to the design of both the training data and the model itself. In the training data, the model learns to understand long videos by leveraging images, multi-image sequences, and short video data. Furthermore, in the model’s architecture, Video-XL applies relative positional encoding to the visual

tokens within each chunk, enabling it to generalize its understanding to infinitely long videos during inference. As shown in Figure 3, the increase of the context length can boost the performance of Video-XL on several long video benchmarks.

| LLM       | Video-MME | MLVU | MMB  |
|-----------|-----------|------|------|
| Vicuna-7B | 36.5      | 48.1 | 63.2 |
| LLaMA2-7B | 38.3      | 49.6 | 66.8 |
| Qwen2-7B  | 41.4      | 52.0 | 70.9 |

Table 4. Video-XL has strong generalization to different LLMs.

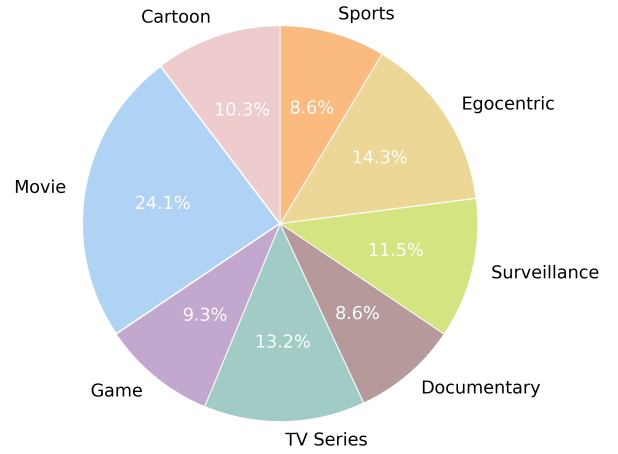

Figure 2. The distribution of video source for VICO.

## E. Analysis of VICO Dataset

To enhance long video understanding and unlock the potential of visual compression, we developed an automated long-video data production pipeline and a high-quality dataset called Visual Clue Order (VICO). In this section, we highlight its key features across several aspects.

**Diversified Video Categories.** VICO offers a comprehensive collection of videos across various genres. Initially, we source videos from CinePile, which includes movies, TV series, and cartoons. Additionally, we collect real-world videos such as egocentric videos, documentaries, games, sports, tutorials, and surveillance footage. The proportion of each video type is illustrated in Figure 2.

**Versatile video length.** VICO comprises videos of diverse lengths, ranging from 1 minute to over 9 minutes, as shown in Figure 3. Additionally, each video is annotated with QA pairs for event/action ordering and detailed captions for individual video clips. This allows MLLMs to leverage the dataset to enhance their long video comprehension capabilities.

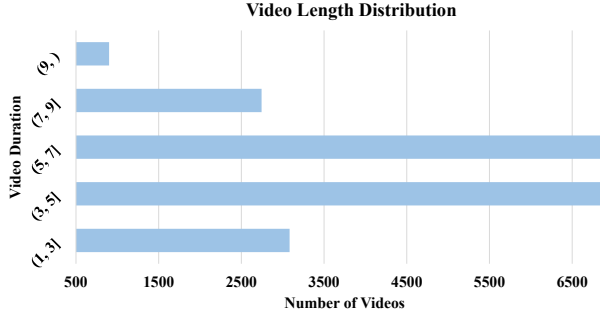

Figure 3. The distribution of video length for VICO.

**Robust Generalization.** With the assistance of VICO, Video-XL can boost its performance on general long video tasks like MLVU and Video-MME. Here, we demonstrate more experimental results, where LongVA and VideoXL are trained with different scaled VICO data. As shown in Table, both LongVA and VideoXL can benefit from the scaling up of VICO, proving that VICO strength the precise and comprehensive retrieval ability of captured information. We provide the prompt for QA generation in Figure 4 and more visualization results of VICO in Figure 5.

| Methods  | Size | MLVU | Video-MME |
|----------|------|------|-----------|
| LongVA   | 5k   | 51.5 | 59.4      |
| LongVA   | 10k  | 51.9 | 60.2      |
| LongVA   | 20k  | 52.6 | 61.3      |
| Video-XL | 5k   | 53.9 | 60.1      |
| Video-XL | 10k  | 54.3 | 60.9      |
| Video-XL | 20k  | 54.9 | 61.8      |

Table 5. The performance of scaling up VICO.

## F. Experimental Settings & Additional Results

We elaborate on the training and inference details of Video-XL. Since our method only modifies the workflow of LLM, the hyperparameters reported are specific to the fine-tuning stage, as shown in Table 6. For the inference details, we emphasize the particular context length for different benchmarks, as shown in Table F.

Although Video-XL is designed for long video understanding, it also demonstrates strong proficiency in image understanding. We conduct extensive experiments on several image QA benchmarks, where Video-XL exhibits significant advantages over previous methods, as shown in Table 8.

| Hyperparameter       | Value          |
|----------------------|----------------|
| Overall batch size   | 8              |
| Learning rate        | 1e-5           |
| LR Scheduler         | Cosine decay   |
| DeepSpeed ZeRO Stage | ZeRO-2-offload |
| Optimizer            | Adam           |
| Warmup ratio         | 0              |
| Epoch                | 1              |
| Weight decay         | 0              |
| Precision            | bf16           |

Table 6. Hyperparameters of Video-XL.

| Dataset            | Context Length |
|--------------------|----------------|
| MLVU               | 256 frms       |
| Video-MME          | 128 frms       |
| VNBench            | 1 fps          |
| LongVideoBench     | 256 frms       |
| VideoVista         | 128 frms       |
| VideoChatGPT Bench | 16 frms        |
| MVBench            | 16 frms        |

Table 7. Experimental settings of Video-XL.

| Methods    | MME    | MMB  | GQA  | POPE | SeedBench |
|------------|--------|------|------|------|-----------|
| LLaMA-VID  | 1521.4 | 65.1 | 64.3 | 86.0 | 59.9      |
| VoCo-LLaMA | 1323.3 | 58.8 | 57.0 | 81.4 | 53.7      |
| Video-XL   | 1530.2 | 75.3 | 65.1 | 83.2 | 59.4      |

Table 8. The performance of Video-XL on mainstream image understanding benchmarks.

## G. Qualitative Results

We present qualitative illustrations in Figures 6–8, where video samples are selected from the long video benchmark MLVU, with durations ranging from 10 to 30 minutes. To showcase the long video understanding capabilities of Video-XL, we focus on two representative tasks. The first is PlotQA, which requires the MLLM to reason about questions related to the plot of a narrative video. The second is video summarization, where the MLLM must summarize the key events in a long video. Video-XL demonstrates its ability to accurately locate relevant video segments based on a given query and provide precise answers. Additionally, it effectively captures the overall content of long videos, including summarizing main plots, describing the actions of key characters, and more.

## Prompt for VICO QA generation

I will provide you with a series of video clip descriptions. Please summarize 4 unique clues from these clips in sequence. Each clue should consist of several words and must be a unique event or action that only appears in one specific clip. Do not include objects, people, or places unless they are integral to describing an event or action. Ensure that the clues are distinct across all clips and are listed in the order they occur.

Please return me the index of the clip and the clue.

The output should be in JSON format as follows:

```
{index1:"clue1", index2:"clue2", index3:"clue3",index4:"clue4"}
```

Figure 4. The GPT prompt for VICO QA generation.

|                                                                                                                                                                                                                                                                                                                                                                                                                           |     |                                                                                      |     |                                                                                       |
|---------------------------------------------------------------------------------------------------------------------------------------------------------------------------------------------------------------------------------------------------------------------------------------------------------------------------------------------------------------------------------------------------------------------------|-----|--------------------------------------------------------------------------------------|-----|---------------------------------------------------------------------------------------|
|                                                                                                                                                                                                                                                                                                                                          | ... |    | ... |    |
| The video shows a man is talking to a woman with blue shirt...                                                                                                                                                                                                                                                                                                                                                            |     | The woman is then shown sitting in the bathtub, looking angry and upset....          |     | The woman quickly gets up and runs out of the room ....                               |
| <p>Q: Please select the correct order of visual elements as they occur in the video.</p> <p>(A) man pushes woman into bathtub -&gt; woman runs out of room -&gt; woman talking to man in window</p> <p>(B) woman talking to man in window -&gt; man pushes woman into bathtub -&gt; woman runs out of room</p> <p>(C) woman talking to man in window -&gt; woman runs out of room -&gt; man pushes woman into bathtub</p> |     |                                                                                      |     |                                                                                       |
|                                                                                                                                                                                                                                                                                                                                        | ... |  | ... |  |
| The video shows a talk between two man, a man lightes a cigar...                                                                                                                                                                                                                                                                                                                                                          |     | The man suddenly stands up and takes a sip of water...                               |     | The standing man opens the door and leaves the room ....                              |
| <p>Q: Select the option that matches the sequence of objects appearing in the video.</p> <p>(A) man takes a sip of water -&gt; standing man leaves the room -&gt; seated man lights a cigar</p> <p>(B) man takes a sip of water -&gt; seated man lights a cigar -&gt; standing man leaves the room</p> <p>(C) seated man lights a cigar -&gt; man takes a sip of water -&gt; standing man leaves the room</p>             |     |                                                                                      |     |                                                                                       |
|                                                                                                                                                                                                                                                                                                                                        | ... |   | ... |  |
| An orange hunter shots to the Daffy Duck, while Bunny ...                                                                                                                                                                                                                                                                                                                                                                 |     | The Daffy Duck reads a book, sits in the red chair...                                |     | The Bugs Bunny lies in the chair, eating a carrot ....                                |
| <p>Q: Please identify the correct chronological sequence of the items in the video.</p> <p>(A) Daffy Duck gets shot by a hunter -&gt; Daffy Duck reads a book -&gt; Bugs Bunny eats carrots</p> <p>(B) Daffy Duck reads a book -&gt; Daffy Duck gets shot by a hunter -&gt; Bugs Bunny eats carrots</p> <p>(C) Bugs Bunny eats carrots -&gt; Daffy Duck gets shot by a hunter -&gt; Daffy Duck reads a book</p>           |     |                                                                                      |     |                                                                                       |

Figure 5. Some visualization cases of VICO data, which includes clip cation (green) and QA pairs for event/action order (blue).



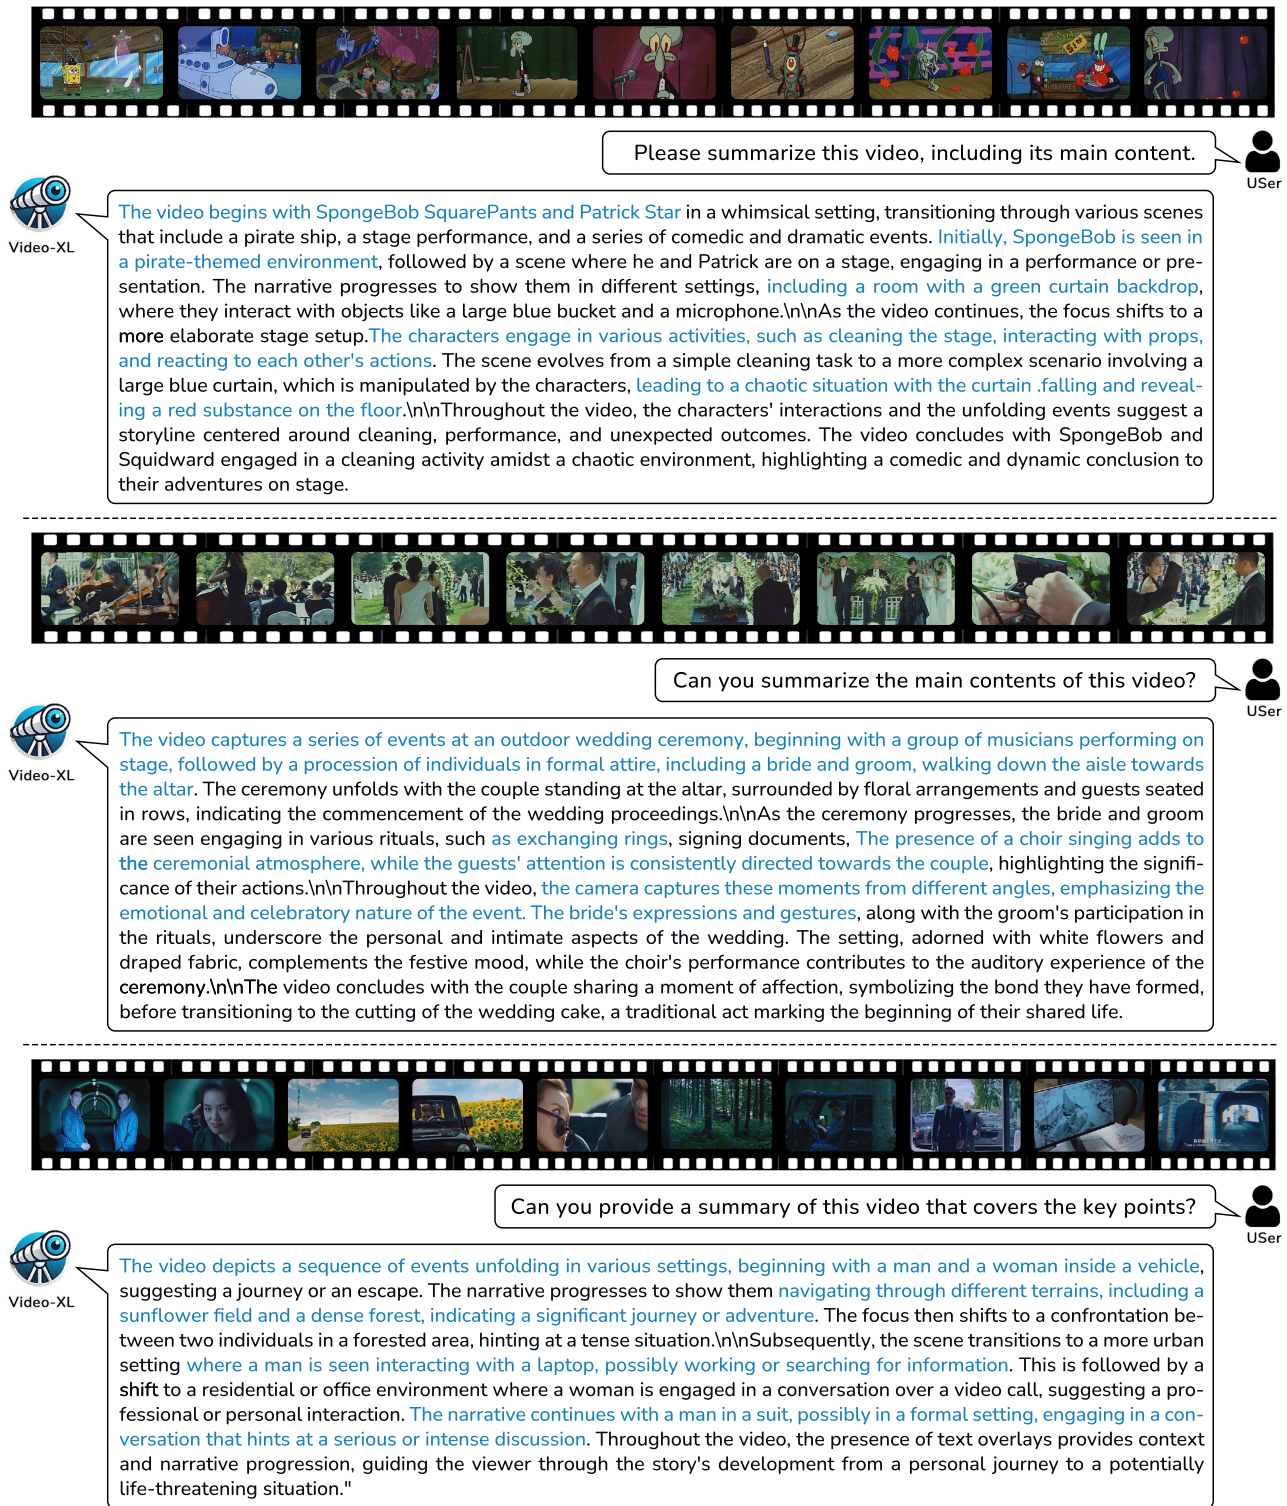

Figure 6. Some visualization cases of Video-XL on visual summarization task.

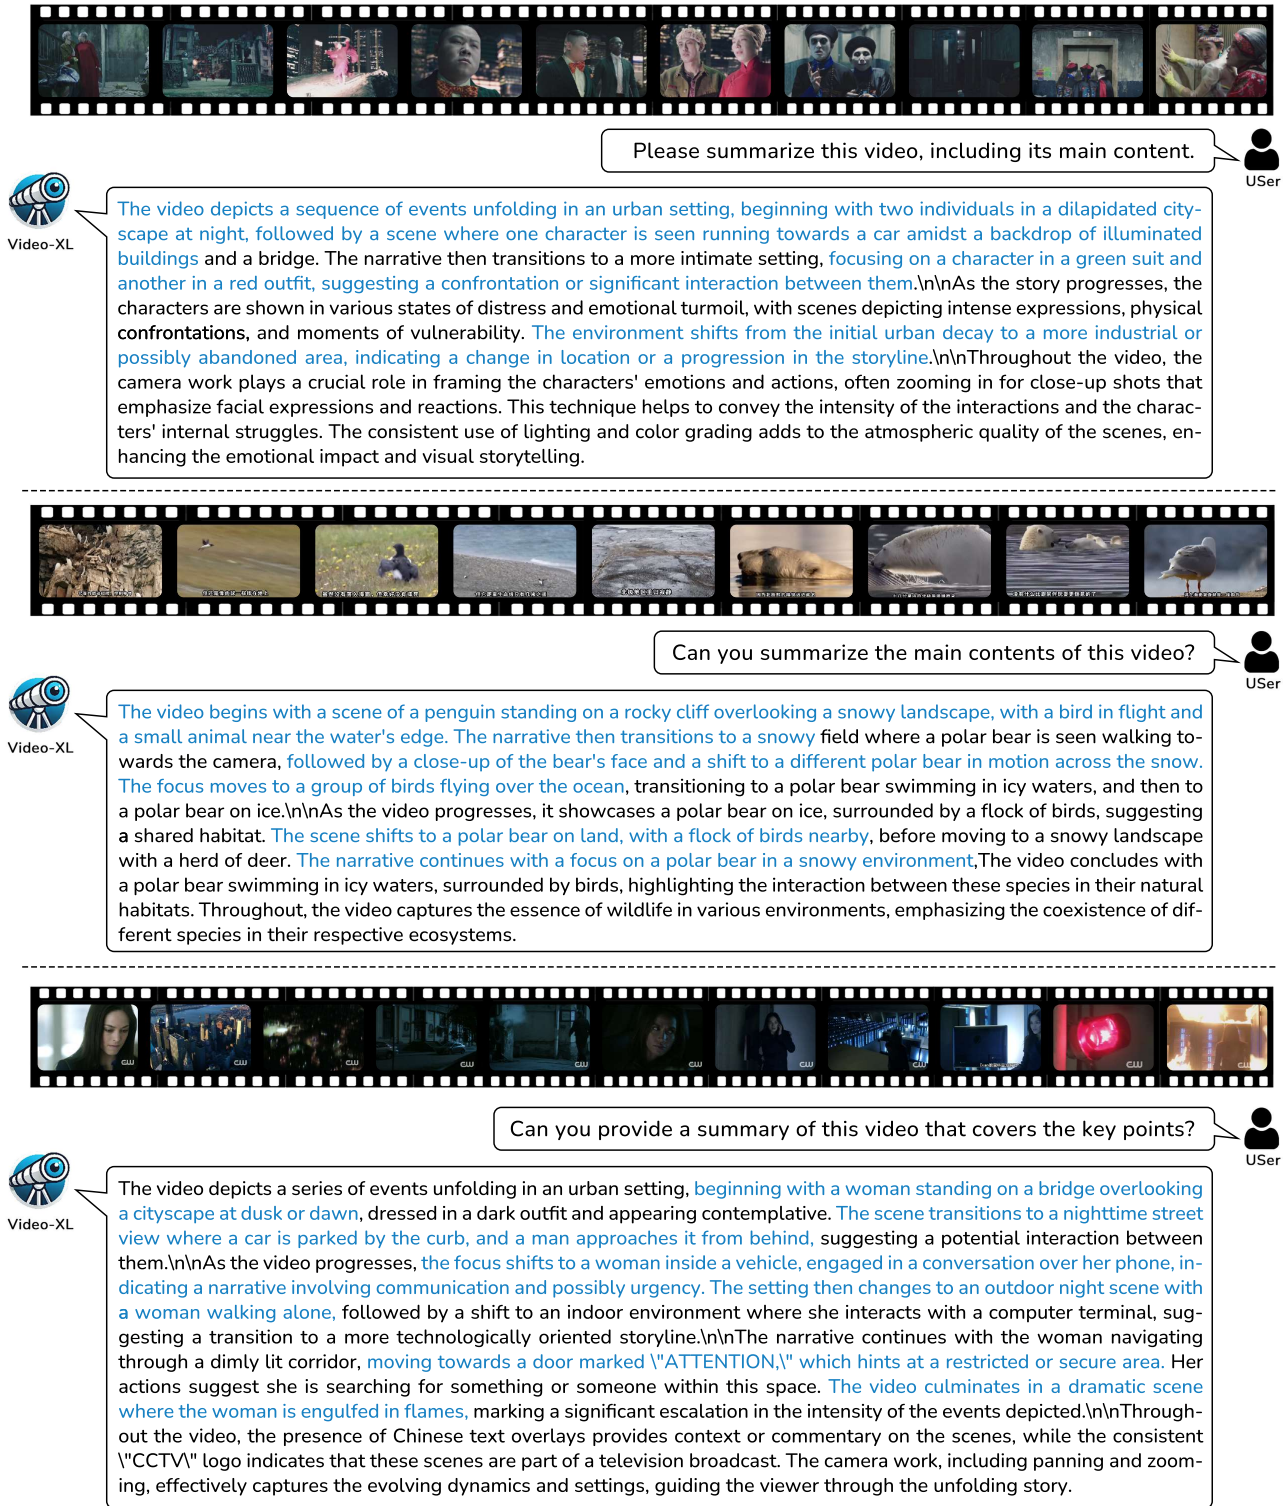

Figure 7. Some visualization cases of Video-XL on visual summarization task.

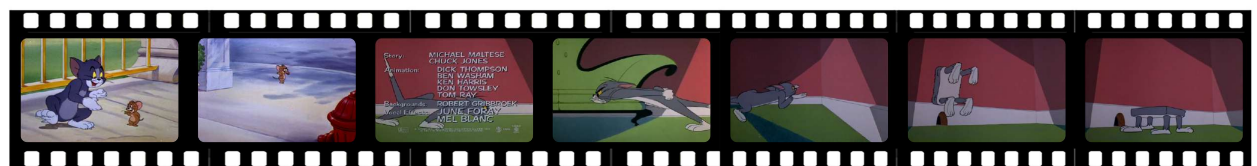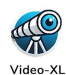

Video-XL

It hits the wall.

Why did the cartoon cat's body become flat like a pancake?

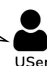

USer

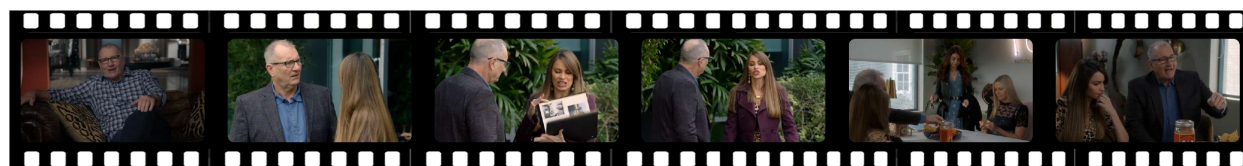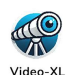

Video-XL

Purple.

What color is the clothes of the woman who leaves after the conversation in the video?

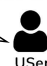

USer

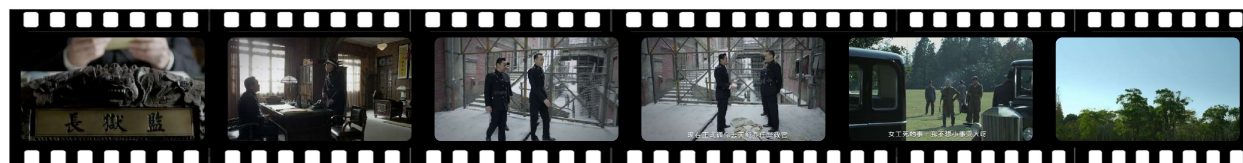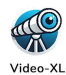

Video-XL

Black.

What color is the cars?

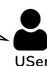

USer

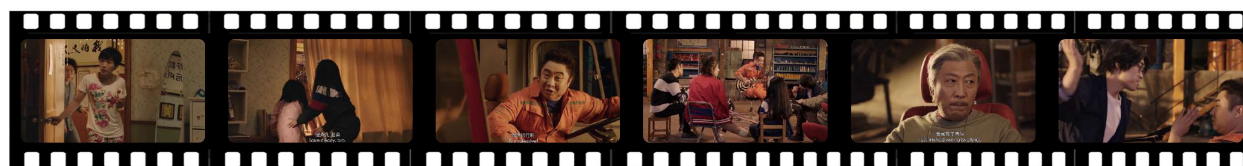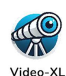

Video-XL

Guitar.

What shape of musical instrument is the building in the video?

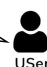

USer

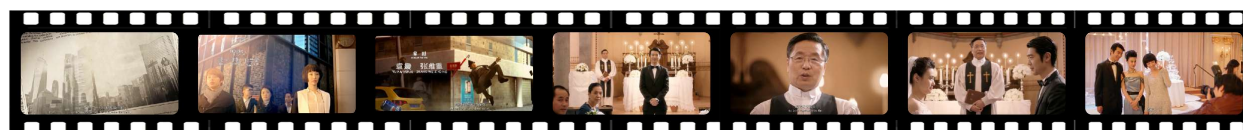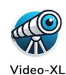

Video-XL

Taking photos.

What is the woman doing at the end of the video?

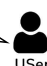

USer

Figure 8. Some visualization cases of Video-XL on plotQA task.
